# Supplementary material for: Traction cytometry: regularization in the Fourier approach and comparisons with finite element method
Source: Royal Society of Chemistry journal article supplement (doi:10.1039/c7sm02214j), 2018-01-01
Supplement: c7sm02214j1.pdf [file c7sm02214j1.pdf]

1 **Supplementary Figure 1**

2 RMS errors in traction reconstructions were calculated in the three cases by using the optimal value  
3 of  $\gamma^*$  obtained for each case as compared to the maximum value of  $\gamma^*$ . Maximum value in this study  
4 corresponded to Case 3, use of which significantly increased errors for Case 1 and case 2  
5 reconstructions. This shows the need for optimization of  $\gamma^*$  on a case by case basis.

6

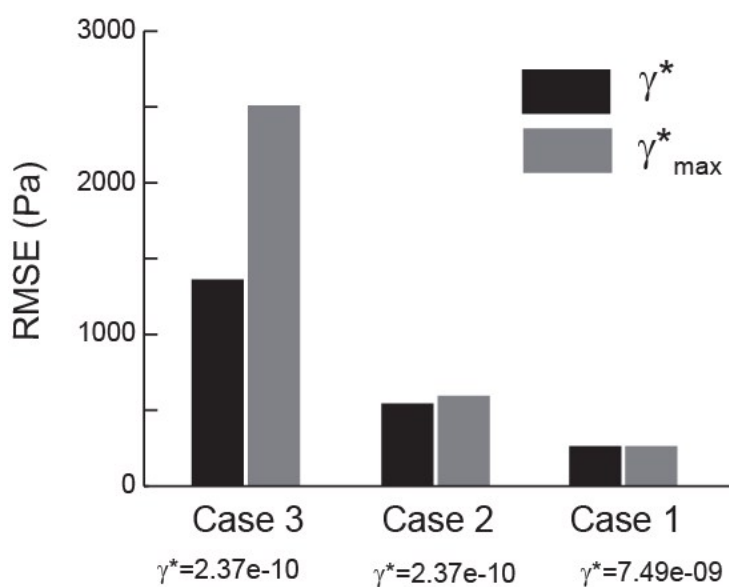

7



1 **Supplementary Figure 1**

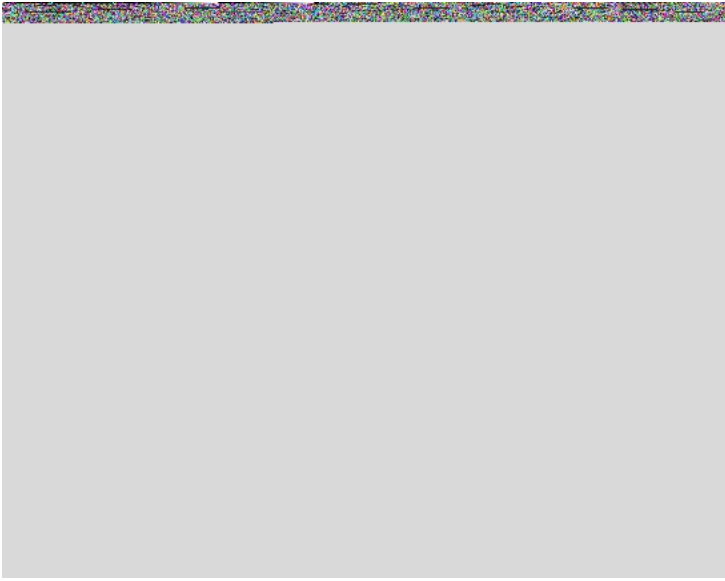

2

3

1 **Table I**

2

3

| <b>Mesh</b>             | <b>Element Count</b> | <b>T<sub>max</sub> (Pa)</b> | <b>T<sub>RMS</sub> (Pa)</b> | <b>T<sub>ΔRMS</sub> (Pa)</b> | <b>T<sub>RMSΔ</sub> (Pa)</b> |
|-------------------------|----------------------|-----------------------------|-----------------------------|------------------------------|------------------------------|
| M1                      | 4373                 | 747.1                       | 121.2                       | -----                        |                              |
| M2                      | 16814                | 1068.6                      | 137.9                       | 16.7                         | 32.5                         |
| M3                      | 67998                | 1185.4                      | 145.7                       | 7.8                          | 15.9                         |
| E <sub>12</sub> : M1-M2 |                      |                             |                             | 1.41%                        | 2.74%                        |
| E <sub>23</sub> : M2-M3 |                      |                             |                             | 0.66%                        | 1.34%                        |

1 **Table II**

| <b>Cell</b> | <b>T<sub>max</sub>(FTTC)<br/>(Pa)</b> | <b><math>\gamma^*</math></b> | <b>T<sub>max</sub>(<math>\gamma^*</math>)<br/>(Pa)</b> | <b>T<sub>max</sub>(<math>\gamma^*_{max}</math>)<br/>(Pa)</b> | <b>Relative error<br/>(%)</b> |
|-------------|---------------------------------------|------------------------------|--------------------------------------------------------|--------------------------------------------------------------|-------------------------------|
| 0           | 1299                                  | $1 \times 10^{-12}$          | 1286                                                   | 1189                                                         | 7.6                           |
| 1           | 1382                                  | $1.7 \times 10^{-12}$        | 1360                                                   | 1287                                                         | 5.4                           |
| 2           | 836                                   | $7.47 \times 10^{-12}$       | 819                                                    | 744                                                          | 9.2                           |
| 3           | 1840                                  | $2.37 \times 10^{-12}$       | 1817                                                   | 1745                                                         | 4                             |
| 4           | 940                                   | $3.16 \times 10^{-12}$       | 923                                                    | 887                                                          | 3.9                           |
| 6           | 826                                   | $7.47 \times 10^{-12}$       | 815                                                    | 799                                                          | 2                             |
| 7           | 789                                   | $1 \times 10^{-13}$          | 789                                                    | 766                                                          | 2.9                           |
| 8           | 1310                                  | $1.78 \times 10^{-11}$       | 1297                                                   | 1297                                                         | 0                             |

2
